# Supplementary material for: Determination of sparfloxacin and besifloxacin hydrochlorides using gold nanoparticles modified carbon paste electrode in micellar medium
Source: Royal Society of Chemistry journal article supplement (doi:10.1039/c6ra04851j), 2016-01-01
Supplement: c6ra04851j1.pdf [file c6ra04851j1.pdf]

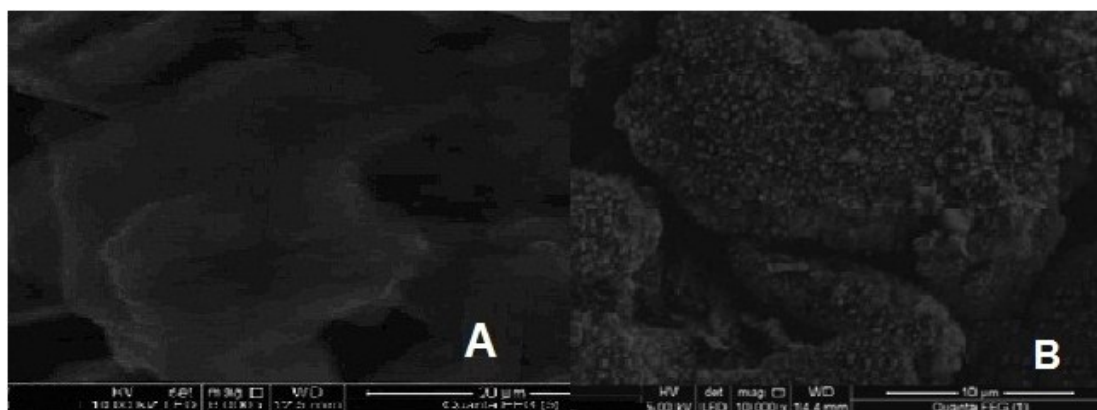

The figure shows the SEM of carbon paste electrode (CPE) (A) and AuCPE (B). The differences are observed in the surface structure of the two electrodes. For CPE, the surface appears as irregularly shaped graphite flakes and separated layers. For AuCPE surface, the nanoparticles appear at different elevations. Moreover, a random distribution and interstices among the nanoparticles were observed in SEM image of the AuCPE producing large surface area.
